# Supplementary material for: Three SRA-Domain Methylcytosine-Binding Proteins Cooperate to Maintain Global CpG Methylation and Epigenetic Silencing in Arabidopsis
Source: PubMed Central journal article supplement (PMC2491724; doi:10.1371/journal.pgen.1000156), 2008-08-15

Figure S5

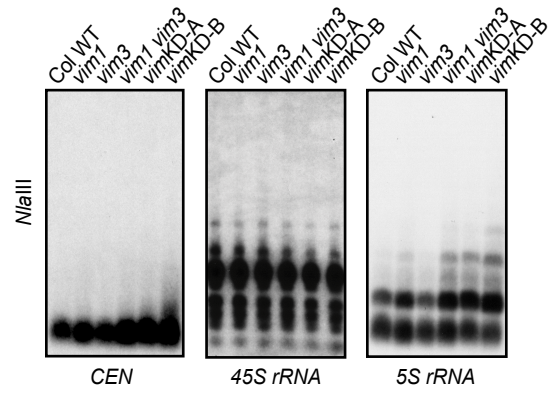

Supplement: pgen.1000156.s005.pdf [file pgen.1000156.s005.pdf]
